# Supplementary material
Source: publisher site journal article supplement (https://www.dovepress.com/article/214197)
Supplement: Supplementary file 1 [file get_supplementary_file.php]

**S1 Table. Summary of rectal mucosa-associated lymphoid tissue lymphoma cases reported in the English literature.**

|    | Author                 | Year | Country | Age | Sex | Initial symptom    | lesion location               | H. pylori status | Comorbidity | Treatment         | Remission | Follow-up | Recurrence |
|----|------------------------|------|---------|-----|-----|--------------------|-------------------------------|------------------|-------------|-------------------|-----------|-----------|------------|
| 1  | Bschorer R et al. [1]  | 1993 | Germany | 56  | M   | Painful defecation | Ano-rectal border             | N                | N           | Chemo + RT        | Y         | 4y        | Y          |
| 2  | Matsumoto T et al. [2] | 1997 | Japan   | 72  | F   | Rectal bleeding    | Rectum                        | Y                | N           | HPE               | Y         | NA        | N          |
| 3  | Gianni L et al. [3]    | 1998 | Italy   | 56  | M   | NA                 | Gastrum, duodenum and rectum  | Y                | NA          | Chemo + HPE       | Y         | 28m       | Y          |
| 4  | Matsumoto T et al. [4] | 1998 | Japan   | 54  | M   | Bowel habit change | Descending                    | N                | NA          | radical resection | Y         | 29m       | N          |
| 5  |                        |      |         | 71  | F   | Hematochezia       | Rectum                        | Y                | NA          | Local excision    | Y         | 32m       | N          |
| 6  |                        |      |         | 62  | F   | Hematochezia       | Rectum<br>With multiple colon | N                | NA          | Local resection   | Y         | 120m      | N          |
| 7  |                        |      |         | 72  | F   | Screening          | Rectum                        | Y                | NA          | EMR               | Y         | 7mo       | N          |
| 8  |                        |      |         | 60  | M   | Screening          | Rectum, Cecum                 | Y                | NA          | EMR               | N         | 9mo       | N          |
| 9  |                        |      |         | 72  | M   | Hematochezia       | Rectum, Sigmoid               | N                | NA          | EMR               | Y         | 43mo      | N          |
| 10 | Yatabe Y et al. [5]    | 1998 | Japan   | 38  | F   | ileus              | Rectum, Cecum                 | N                | N           | Surgery           | Y         | 24m       | N          |
| 11 |                        | 1998 | Japan   | 75  | M   | Screening          | Rectum                        | N                | N           | Surgery           | Y         | 24m       | N          |
| 12 | Orita M et al. [6]     | 1999 | Japan   | 64  | F   | Fecal occult blood | Rectum                        | N                | N           | APR               | Y         | 2y11m     | N          |
| 13 | Hosaka S et al. [7]    | 1999 | Japan   | 56  | M   | Fecal occult blood | Rectum                        | N                | N           | Resection         | Y         | X         | N          |

|    |                           |      |       |    |   |                          |                                |   |                                                |                     |   |       |   |
|----|---------------------------|------|-------|----|---|--------------------------|--------------------------------|---|------------------------------------------------|---------------------|---|-------|---|
| 14 | Inoue F et al.<br>[8]     | 1999 | Japan | 62 | F | Hematochezia             | Rectum                         | N | N                                              | HPE                 | Y | 53wks | N |
| 15 | Takenaka R et al.<br>[9]  | 2000 | Japan | 76 | M | Fecal occult blood       | Lower (1), Upper (2) rectum    | N | Y (TB, DM, chronic glomerulonephritis, angina) | Observation         | Y | 19m   | N |
| 16 | Hasegawa N et al.<br>[10] | 2000 | Japan | 72 | F | Abdominal pain           | Sigmoid multiple               | N | Y (liver cirrhosis)                            | Surgical Resection  | Y | X     | N |
| 17 | Gavioli M et al.<br>[11]  | 2001 | Italy | 45 | M | Hematochezia             | Rectum                         | N | N                                              | Chemo               | Y | 4mo   | Y |
| 18 | Tanimoto A et al.<br>[12] | 2002 | Japan | 75 | F | Hematochezia             | Rectum (5cm inside anal verge) | N | N                                              | APR c LN dissection | Y | 9m    | N |
| 19 | Nakase H et al.<br>[13]   | 2002 | Japan | 33 | F | Hematochezia             | Rectum                         | N | N                                              | Antibiotics         | Y | 10m   | N |
| 20 |                           | 2002 | Japan | 62 | F | Hematochezia             | Rectum                         | N | N                                              | HPE                 | Y | 6m    | N |
| 21 |                           | 2002 | Japan | 66 | F | Hematochezia             | Rectum                         | N | Y (B-cell lymphoma in rectum)                  | HPE                 | Y | 1.5y  | N |
| 22 | Hisabe T et al.<br>[14]   | 2002 | Japan | 70 | F | Abdominal discomfort     | Rectum                         | N | N                                              | HPE                 | Y | 20m   | N |
| 23 | Rey J et al.<br>[15]      | 2002 |       | 42 | F | Tenesmus/rectal bleeding | Rectum                         | N | Y (Chronic lymphocytic leukemia)               | Chemo               | Y | NA    | N |

|    |                          |      |       |    |   |                          |                                      |   |                        |                                      |   |     |   |
|----|--------------------------|------|-------|----|---|--------------------------|--------------------------------------|---|------------------------|--------------------------------------|---|-----|---|
| 24 | Chim CS et al.<br>[16]   | 2003 | China | 43 | F | Rectal<br>bleeding       | Rectum/descending<br>colon(multiple) | N | Y (pseudo<br>lymphoma) | Chemo                                | Y | 18m | N |
| 25 | Tanaka S et al.<br>[17]  | 2003 | Japan | 62 | M | Screening<br>colonoscopy | Sigmoid colon                        | N | N                      | Preoperative<br>chemo<br>+EMR        | Y | 88m | Y |
| 26 | Navarra G et<br>al. [18] | 2003 |       | 54 | F | Bowel<br>obstruction     | Rectum                               | N | N                      | Preoperative<br>Chemo<br>+ resection | Y | 36m | N |
| 27 | Dohden K et<br>al. [19]  | 2004 |       | 60 | F | Hematochezia             | Rectum                               | Y | N                      | Antibiotics                          | Y | X   | N |
| 28 | Hori K et al.<br>[20]    | 2004 | Japan | 83 | F | Anal swelling            | Rectum                               | Y | NA                     | Antibiotics                          | Y | 7m  | N |
| 29 | Kojima M et<br>al. [21]  | 2005 | Japan | 46 | F | No symptom               | Rectum                               | N | N                      | Polypectomy                          | Y | 54m | N |
| 30 |                          | 2005 | Japan | 64 | F | Fecal occult<br>blood    | Rectum                               | N | N                      | Polypectomy                          | Y | 26m | N |
| 31 |                          | 2005 | Japan | 66 | F | Hematochezia             | Rectum                               | N | N                      | Polypectomy<br>+RT                   | N | NA  | Y |
| 32 | Lee YG et al.<br>[22]    | 2005 | Korea | 47 | M | tenesmus                 | Rectum                               | N | N                      | CHOP+RT                              | Y | NA  | N |
| 33 | Ahlawat S et<br>al. [23] | 2005 | USA   | 57 | F | NA                       | Rectum                               | N | N                      | EMR                                  | Y | 1y  | N |

|    |                             |      |        |    |   |                            |                                 |   |                                     |                                         |   |     |   |
|----|-----------------------------|------|--------|----|---|----------------------------|---------------------------------|---|-------------------------------------|-----------------------------------------|---|-----|---|
| 34 | Matsuo S et al.<br>[24]     | 2006 | Japan  | 75 | F | Fecal occult<br>blood      | Transverse colon                | Y | HTN, DM,<br>cholecystolithi<br>asis | Partial<br>colectomy c LN<br>dissection | Y | 12m | N |
| 35 | Ahlawat S et<br>al. [25]    | 2006 | USA    | 69 | M | NA                         | Rectum, cecum                   | N | N                                   | EMR                                     | Y | 8m  | N |
| 36 | Shin BK et al.<br>[26]      | 2007 | Korea  | 43 | F | Lower<br>abdominal<br>pain | Rectum,<br>Duodenum,<br>Stomach | N | N                                   | Chemo                                   | Y | NA  |   |
| 37 | Mehta R et al.<br>[27]      | 2008 | USA    | 53 | F | Hematochezia               | Ascending colon<br>and Cecum    | N | Y(GERD)                             | Extended right<br>hemicolectomy         | Y | 7m  |   |
| 38 | Kobayashi T<br>et al. [28]  | 2008 | Japan  | 26 | M | Constipation               | Rectum                          | N | N                                   | HPE + RT                                | Y | 24m |   |
| 39 | Piotrowski R<br>et al. [29] | 2008 | USA    | 83 | F | anemia                     | Sigmoid colon                   | N | Y (DM,<br>Alzheimer)                | RT+polypecto<br>my                      | Y |     |   |
| 40 | Amouri A et<br>al. [30]     | 2009 | French | 46 | F | Rectal<br>bleeding         | Rectum                          | Y | N                                   | HPE+RT                                  | N | 12m |   |
| 41 | Mathew A et<br>al. [31]     | 2009 | USA    | 65 | F | No symptom                 | Rectum                          | Y | N                                   | HPE                                     | Y | 4y  |   |
| 42 | Chihara D et<br>al. [32]    | 2010 | Japan  | 57 | F | Fecal occult<br>blood      | Rectum                          | N | N                                   | Chemo                                   | Y | 34m |   |
| 43 |                             | 2010 | Japan  | 75 | F | Hematochezia               | Rectum                          | N | N                                   | Chemo                                   | Y | 79m |   |
| 44 |                             | 2010 | Japan  | 83 | F | Hematochezia               | Rectum                          | N | N                                   | Chemo                                   | Y | 43m |   |
| 45 | Ersoz F et al.<br>[33]      | 2010 |        | 44 | F | Mass prolapse              | Rectum                          | N | N                                   | Transanal<br>excision                   | Y | 27m |   |

|    |                          |      |       |    |   |                          |                                                      |   |                                                                   |                                               |   |     |  |
|----|--------------------------|------|-------|----|---|--------------------------|------------------------------------------------------|---|-------------------------------------------------------------------|-----------------------------------------------|---|-----|--|
| 46 | Park JH et al.<br>[34]   | 2010 | Korea | 59 | M | Abdominal<br>discomfort  | Cecum                                                | N | Angina                                                            | Radical<br>resection+CHO<br>P                 | Y |     |  |
| 47 | Chahil N et al.<br>[35]  | 2011 | USA   | 78 | F | Hematochezia             | Rectum                                               | Y | osteoarthritis,<br>hyperlipidemi<br>a, dyspepsia                  | HPE + RT                                      | Y | 3y  |  |
| 48 | Chen PH et al.<br>[36]   | 2011 | Korea | 61 | M | Occult blood<br>positive | Ascending colon                                      | N | Infarction,<br>DM                                                 | EMR                                           | Y | X   |  |
| 49 | Devi P et al.<br>[37]    | 2011 | India | 68 | F | Hematochezia             | Hepatic flexure of<br>colon                          | N | Y (colon ca)                                                      | Right<br>hemicolectomy                        | Y | 2m  |  |
| 50 | Okamura T et<br>al. [38] | 2012 | Japan | 62 | F | Fecal occult<br>blood    | lower rectum                                         | N | NA                                                                | RT                                            | Y | 13m |  |
| 51 |                          | 2012 | Japan | 65 | M | Fecal occult<br>blood    | lower rectum                                         | N | Y (Gastric<br>cancer)                                             | RT                                            | Y | 65m |  |
| 52 |                          | 2012 | Japan | 56 | F | Hematochezia             | upper rectum, lower<br>rectum (sessile<br>elevators) | N | NA                                                                | RT                                            | Y | 75m |  |
| 53 | Park H et al.<br>[39]    | 2012 | Korea | 44 | M | Hematochezia             | Rectum (AV2cm)                                       | N | Y (diabetes<br>mellitus,<br>Parkinson's<br>disease, and<br>gout.) | Endoscopic<br>Unroofing<br>Technique+<br>CHOP | Y | 11m |  |
| 54 | Akasaka R et<br>al. [40] | 2012 | Japan | 57 | F | Bleeding                 | Rectum                                               | N | N                                                                 | Radiation                                     | Y | 9m  |  |
| 55 |                          | 2012 | Japan | 64 | F |                          | Cecum                                                | N | N                                                                 | EMR                                           | Y | 70m |  |

|    |                         |      |       |    |   |                       |                     |   |                         |                         |   |     |   |
|----|-------------------------|------|-------|----|---|-----------------------|---------------------|---|-------------------------|-------------------------|---|-----|---|
| 56 |                         | 2012 | Japan | 50 | F | Occult blood positive | Sigmoid             | N | N                       | Radical resection       | Y | X   | N |
| 57 |                         | 2012 | Japan | 57 | F | Abdominal pain        | Rectum              | N | N                       | EMR                     | Y | X   | N |
| 58 | Tokunou K et al. [41]   | 2013 | Japan | 67 | F | Bowel abnormality     | Rectum              | Y | N                       | Transanal surgery + HPE | Y | NA  | N |
| 59 | Shaheen S et al. [42]   | 2013 | USA   | 79 | M | Screening colonoscopy | Transverse colon    | N | Colon cancer            | CHOP                    | Y | 6m  | N |
| 60 | Matsumoto T et al. [43] | 2013 | Japan | 80 | W | Occult blood          | Ascending colon     | Y | N                       | HPE                     | Y | 6m  | N |
| 61 | Hasegawa D et al. [44]  | 2013 | Japan | 79 | M | bleeding              | Transverse colon    | N | N                       | ESD                     | Y | X   | N |
| 62 | Kim MH et al. [45]      | 2014 | Korea | 54 | F | Screening             | sigmoid             | N | N                       | EMR                     | Y | 10m | N |
| 63 | Seo SW et al. [46]      | 2014 | Korea | 64 | M | Screening             | Transverse colon    | N | Gastritis, dyslipidemia | Radical resection       | Y | X   | N |
| 64 | Nosaka K et al. [47]    | 2014 | Japan | 74 | M | NA                    | Rectum              | Y | Y(gastritis)            | HPE                     | Y | 18m | Y |
| 65 | Tokura T et al. [48]    | 2015 | Japan | 60 | F | Melena                | Rectum              | N | N                       | Radical resection       | Y | NA  | N |
| 66 | Abbas H et al. [49]     | 2017 | USA   | 56 | F | Weight loss           | Hepatic flexure 5cm | Y |                         | HPE+rituximab           | Y |     | N |
| 67 | Nam MJ et al. [50]      | 2017 | Korea | 54 | F | Screening             | Rectum, cecum, anus | N | Breast cancer           | EMR+HPE                 | Y | 21m | N |

## References

1. Bschorer R, Lingenfeller T, Kaiserling E, Schwenger N. Malignant lymphoma of the mucosa-associated lymphoid tissue (MALT)--consecutive unusual manifestation in the rectum and gingiva. *J Oral Pathol Med.* 1993; 22(4):190-2.
2. Matsumoto T, Iida M, Shimizu M. Regression of mucosa-associated lymphoid-tissue lymphoma of rectum after eradication of *Helicobacter pylori*. *Lancet.* 1997; 350(9071):115-6.
3. Gianni L, Tassinari D, Sartori S, Rinaldi P, Ravaioli A. Gastric, duodenal and rectal multifocal MALT lymphoma: the possible co-existence of two different cell populations. *Eur J Cancer.* 1998; 34(10):1640-1.
4. Matsumoto T, Shimizu M, Iida M, Amano K, Nakamura S, Fujishima M. Primary low-grade, B-cell, mucosa-associated lymphoid tissue lymphoma of the colorectum: clinical and colonoscopic features in six cases. *Gastrointest Endosc.* 1998; 48(5):501-8.
5. Yatabe Y, Nakamura S, Nakamura T, Seto M, Ogura M, Kimura M, Kuhara H, Kobayashi T, Taniwaki M, Morishima Y, Koshikawa T, Suchi T. Multiple polypoid lesions of primary mucosa-associated lymphoid-tissue lymphoma of colon. *Histopathology.* 1998; 32(2):116-25.
6. Orita M, Yamashita K, Okino M, Enoki T, Noshima S, Morita N, Esato K. A case of MALT (mucosa-associated lymphoid tissue) lymphoma occurring in the rectum. *Hepatogastroenterology.* 1999; 46(28):2352-4.

7. Hosaka S, Akamatsu T, Nakamura S, Kaneko T, Kitano K, Kiyosawa K, Ota H, Hosaka N, Miyabayashi H, Katsuyama T. Mucosa-associated lymphoid tissue (MALT) lymphoma of the rectum with chromosomal translocation of the t(11;18)(q21;q21) and an additional aberration of trisomy 3. *Am J Gastroenterol*. 1999; 94(7):1951-4.
8. Inoue F, Chiba T. Regression of MALT lymphoma of the rectum after anti-H. pylori therapy in a patient negative for H. pylori. *Gastroenterology*. 1999; 117(2):514-5.
9. Takenaka R, Tomoda J, Sakata T, Ichiba T, Motoi M, Mizuno M, Tsuji T. Mucosa-associated lymphoid tissue lymphoma of the rectum that regressed spontaneously. *J Gastroenterol Hepatol*. 2000; 15(3):331-5.
10. Hasegawa N, Kato K, Yamada K, Morita K, Kuroiwa M, Ito H. Extranodal marginal zone B-cell lymphoma of mucosa-associated lymphoid tissue (MALT) of the sigmoid colon. *Gastrointest Endosc*. 2000; 52(6):802-4.
11. Gavioli M, Bagni A, Santacroce G, Piccagli I, Natalini G. Endorectal sonographic appearances of rectal MALT lymphoma, its response to therapy, and local recurrence. *J Clin Ultrasound*. 2001; 29(7):401-5.
12. Tanimoto A, Hamada T, Yamamoto T, Kimura S, Matsuki Y, Sasaguri Y. MALT lymphoma with extreme plasma cell differentiation of the rectum. *Am J Gastroenterol*. 2002; 97(7):1860-2.
13. Nakase H, Okazaki K, Ohana M, Ikeda K, Uchida K, Uose S, Itoh T, Iwano M, Watanabe N, Yazumi S, Kawanami C, Inoue F, Chiba T. The possible involvement of micro-organisms other than *Helicobacter pylori* in the development of rectal MALT lymphoma in H. pylori-negative patients. *Endoscopy*. 2002; 34(4):343-6.



14. Hisabe T, Imamura K, Furukawa K, Tsuda S, Matsui T, Yao T, Kanda M, Ohshima K, Kikuchi M. Regression of CD5-positive and Helicobacter pylori-negative mucosa-associated lymphoid tissue lymphoma of the rectum after administration of antibiotics: report of a case. *Dis Colon Rectum*. 2002; 45(9):1267-70.
15. Rey J, Coso D, Ramuz O, Xerri L, Sainty D, Giovannini M, Bouabdallah R. Low-grade rectal malt lymphoma occurring in a patient with chronic lymphocytic leukaemia. *Br J Haematol*. 2002; 119(4):1137-8.
16. Chim CS, Shek TW, Chung LP, Liang R. Unusual abdominal tumors: case 3. Multiple lymphomatous polyposis in lymphoma of colon. *J Clin Oncol*. 2003; 21(5):953-5.
17. Tanaka S, Ohta T, Kaji E, Kosaka T, Murakami I. EMR of mucosa-associated lymphoid tissue lymphoma of the rectum. *Gastrointest Endosc*. 2003; 57(7):956-9.
18. Navarra G, Adani GL, Bardella E, Ascanelli S, Turini A, Pozza E. Primary rectal lymphoma as a cause of bowel obstruction. Report of a case. *Tumori*. 2003; 89(1):88-90.
19. Dohden K, Kaizaki Y, Hosokawa O, Hayashi H, Hattori M. Regression of rectal mucosa-associated lymphoid tissue lymphoma but persistence of Helicobacter pylori infection of gastric mucosa after administration of levofloxacin: report of a case. *Dis Colon Rectum*. 2004; 47(9):1544-6.
20. Hori K, Suguro M, Koizuka H, Sakagami T, Tomita T, Kosaka T, Fukuda Y. Disappearance of rectal mucosa-associated lymphoid tissue lymphoma following antibiotic therapy. *Dig Dis Sci*. 2004; 49(3):413-6.

21. Kojima M, Itoh H, Motegi A, Sakata N, Masawa N. Localized lymphoid hyperplasia of the rectum resembling polypoid mucosa-associated lymphoid tissue lymphoma: a report of three cases. *Pathol Res Pract*. 2005; 201(11):757-61.
22. Lee YG, Lee S, Han SW, Lee JS. A case of multiple mucosa-associated lymphoid tissue (MALT) lymphoma of the colon identified as simple mucosal discoloration. *J Korean Med Sci*. 2005; 20(2):325-8.
23. Ahlawat S, Haddad N, Kanber Y, Cohen P, Ozdemirli M, Benjamin S. Primary mucosa-associated lymphoid tissue lymphoma occurring in the rectum. *Gastrointest Endosc*. 2005; 62(3):443-4; discussion 444.
24. Matsuo S, Mizuta Y, Hayashi T, Susumu S, Tsutsumi R, Azuma T, Yamaguchi S. Mucosa-associated lymphoid tissue lymphoma of the transverse colon: a case report. *World J Gastroenterol*. 2006; 12(34):5573-6.
25. Ahlawat S, Kanber Y, Charabaty-Pishvaian A, Ozdemirli M, Cohen P, Benjamin S, Haddad N. Primary mucosa-associated lymphoid tissue (MALT) lymphoma occurring in the rectum: a case report and review of the literature. *South Med J*. 2006; 99(12):1378-84.
26. Kyung Shin B, Lee H, Choi J, Kim A, Kim H, Park J, Kim I. Primary marginal zone B-cell lymphoma of gastrointestinal tract presenting as multiple lymphomatoid polyposis. *Int J Colorectal Dis*. 2007; 22(8):991-2.
27. Mehta RS, Modi N, Sapanara N, Ramachandra P, Mikhail M. Extranodal marginal zone B-cell mucosa-associated lymphoid tissue (MALT) lymphoma of cecum presenting as bright red bleed per rectum--a case report with review of literature. *J Gastrointest Cancer*. 2008; 39(1-4):66-72.

28. Kobayashi T, Takahashi N, Hagiwara Y, Tamaru J, Kayano H, Jin-nai I, Bessho M, Niitsu N. Successful radiotherapy in a patient with primary rectal mucosa-associated lymphoid tissue lymphoma without the API2-MALT1 fusion gene: a case report and review of the literature. *Leuk Res.* 2008; 32(1):173-5.
29. Piotrowski R, Kramer R, Kamal A. Image of the month. Extranodal marginal zone B-cell (mucosa-associated lymphoid tissue) lymphoma of the colon presenting as an obstructing mass. *Clin Gastroenterol Hepatol.* 2008; 6(4):e18-19.
30. Amouri A, Chtourou L, Mnif L, Mdhaftar M, Abid M, Ayedi L, Daoud J, Elloumi M, Boudawara T, Tahri N. MALT lymphoma of the rectum: a case report treated by radiotherapy. *Cancer Radiother.* 2009; 13(1):61-4.
31. Mathew A, Humburg BC, Bayer MG. A case of rectal MALT lymphoma treated by endoscopic resection. *Am J Gastroenterol.* 2009; 104(1):255-6.
32. Chihara D, Kagami Y, Oki Y, Kato H, Onoda H, Ine S, Taji H, Yamamoto K, Morishima Y. R-CHOP therapy for MALT lymphoma of the rectum. *Eur J Haematol.* 2010; 84(1):84-6.
33. Ersoz F, Toros AB, Bektas H, Ozcan O, Koc O, Arikan S. MALT lymphoma of the rectum, presenting with rectal prolapsus: a case report. *Cases J.* 2010; 3(1):33.
34. Park JH, Lee JH. MALT (Mucosa-Associated Lymphoid Tissue) Lymphoma of the Colon. *The Korean Journal of Gastroenterology.* 2010; 55(4):213-6.
35. Chahil N, Bloom P, Tyson J, Jazwari S, Robilotti J, Gaultieri N. Novel approach to treatment of rectal mucosa-associated lymphoid tissue lymphoma. *BMJ Case Rep.* 2011; 2011:2969.

36. Chen PH, Lin YM, Yen HH. Primary mucosa-associated lymphoid tissue lymphoma of the colon. *Clin Gastroenterol Hepatol*. 2011; 9(8):e74-75.
37. Devi P, Pattanayak L, Samantaray S. Synchronous adenocarcinoma and mucosa-associated lymphoid tissue lymphoma of the colon. *Saudi J Gastroenterol*. 2011; 17(1):69-71.
38. Okamura T, Suga T, Iwaya Y, Ito T, Yokosawa S, Arakura N, Ota H, Tanaka E. Helicobacter pylori-Negative Primary Rectal MALT Lymphoma: Complete Remission after Radiotherapy. *Case Rep Gastroenterol*. 2012; 6(2):319-27.
39. Park H, Chung J-W, Kim AJ, Park SY, Rim MY, Jang YR, Lee JH, Park S. A Case of Rectal Mucosa-associated Lymphoid Tissue Lymphoma Diagnosed by Endoscopic Unroofing Technique. *The Korean Journal of Gastroenterology*. 2012; 59(6):428.
40. Akasaka R, Chiba T, Dutta AK, Toya Y, Mizutani T, Shozushima T, Abe K, Kamei M, Kasugai S, Shibata S, Abiko Y, Yokoyama N, Oana S, Hirota S, Endo M, Uesugi N, Sugai T, Suzuki K. Colonic mucosa-associated lymphoid tissue lymphoma. *Case Rep Gastroenterol*. 2012; 6(2):569-75.
41. Tokunou K, Yamamoto T, Toshimitsu H, Kitamura Y, Ando S. A case of mucosa-associated lymphoid tissue lymphoma of the rectum. *Gan To Kagaku Ryoho*. 2013; 40(12):2056-8.
42. Shaheen S, Guddati AK. Secondary mucosa-associated lymphoid tissue (MALT) lymphoma of the colon. *Med Oncol*. 2013; 30(2):502.
43. Matsumoto T, Inokuma T, Imai Y. Education and imaging. Gastrointestinal: colonic mucosa-associated lymphoid tissue lymphoma regressed by levofloxacin. *J Gastroenterol Hepatol*. 2013; 28(4):750.

44. Hasegawa D, Yoshida N, Ishii M, Takamasu M, Kishimoto M, Yagi N, Yagi N, Naitou Y, Yanagisawa A. A case of colonic mucosa-associated lymphoid tissue lymphoma observed under endoscopy with narrow-band imaging. *Nihon Shokakibyō Gakkai Zasshi*. 2013; 110(12):2100-6.
45. Kim MH, Jung JT, Kim EJ, Kim TW, Kim SY, Kwon JG, Kim EY, Sung WJ. A case of mucosa-associated lymphoid tissue lymphoma of the sigmoid colon presenting as a semipedunculated polyp. *Clin Endosc*. 2014; 47(2):192-6.
46. Seo SW, Lee SH, Lee DJ, Kim KM, Kang JK, Kim DW, Lee JH. Colonic mucosa-associated lymphoid tissue lymphoma identified by chromoendoscopy. *World J Gastroenterol*. 2014; 20(48):18487-94.
47. Nosaka K, Shono T, Yonemura Y, Iyama K, Sasaki Y, Endo S, Okuno Y, Mitsuya H. Regression of primary rectal MALT lymphoma after *Helicobacter pylori* eradication. *Rinsho Ketsueki*. 2014; 55(8):948-52.
48. Tokura T, Nishikawa S, Umehara M, Umehara Y, Murata A, Takahashi K, Morita T. A Case of MALT Lymphoma of the Rectum Treated with Intersphincteric Resection (ISR). *Gan To Kagaku Ryoho*. 2015; 42(12):2265-7.
49. Abbas H, Niazi M, Makker J. Mucosa-Associated Lymphoid Tissue (MALT) Lymphoma of the Colon: A Case Report and a Literature Review. *Am J Case Rep*. 2017; 18:491-7.
50. Nam MJ, Kim BC, Park SC, Hong CW, Han KS, Sohn DK, Park WS, Chang HJ, Oh JH. Mucosa-Associated Lymphoid-Tissue Lymphoma of the Cecum and Rectum: A Case Report. *Ann Coloproctol*. 2017; 33(1):35-8.
